# Supplementary material for: Tumor infiltrated immune cell types support distinct immune checkpoint inhibitor outcomes in patients with advanced non‐small cell lung cancer
Source: PubMed Central journal article supplement — Eur J Immunol. 2021 Feb 22;51(4):956–64. doi: 10.1002/eji.202048966 (PMC8248238; doi:10.1002/eji.202048966), 2021-02-22
Supplement: EJI-51-956-s002.pdf [file EJI-51-956-s002.pdf]

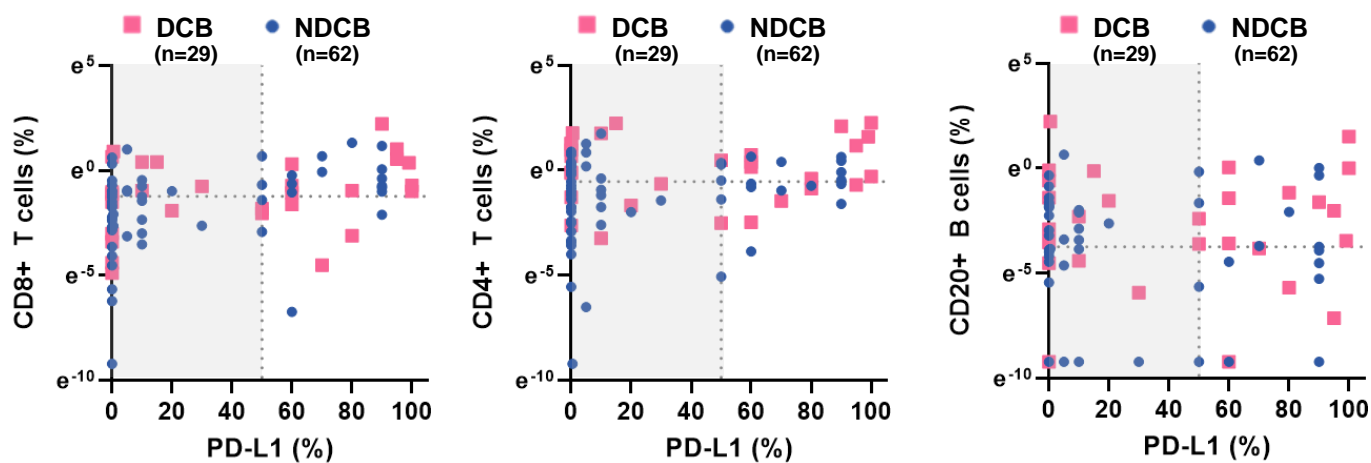

**Supplementary Figure 1. Association of clinical benefit between PD-L1 and immune cells.** Dot plot of color-coded clinical benefit of the patients. Dashed lines represent the cutoff values, which were 50% for PD-L1 and median for immune cells. DCB, durable clinical benefit; NDCB, non-durable clinical benefit

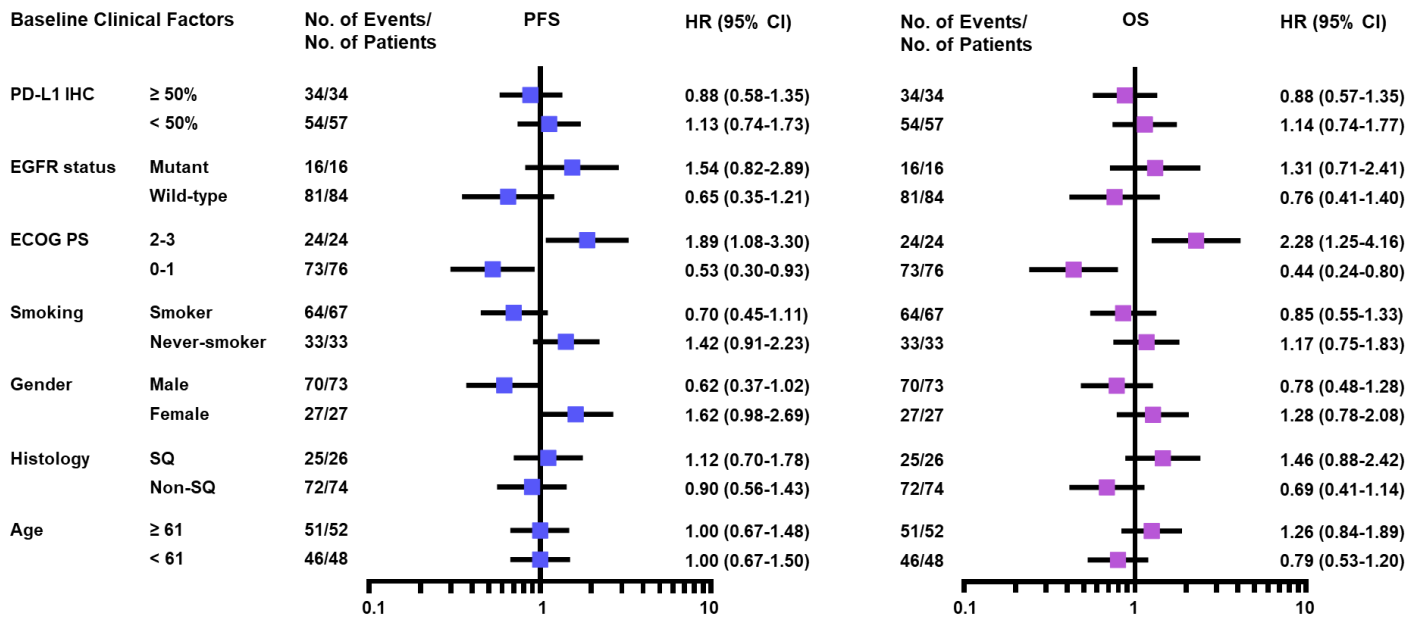

**Supplementary Figure 2. Hazard ratios of advanced NSCLC treated with PD-1 blockade.** Forest plots showing the hazard ratio (HR) of PFS and OS for baseline clinical factors.

**Supplementary Table 1.** ROC analysis of DCB at immune cell proportion in tumor region.

| All (n=100)                | CD8 T cell | CD4 T cell | B cell |
|----------------------------|------------|------------|--------|
| AUC                        | 0.626      | 0.698      | 0.697  |
| <i>P</i> value             | 0.047      | 0.002      | 0.002  |
| Cutoff                     |            |            |        |
| Immune cell proportion (%) | 0.4        | 1.32       | 0.12   |
| ≥ cutoff value             |            |            |        |
| Sensitivity (%)            | 67         | 80         | 78     |
| Specificity (%)            | 50         | 50         | 50     |

ROC, receiver operating characteristic; DCB, durable clinical benefit

**Supplementary Table 2.** Comparison of immune cells between DCB and NDCB in NSCLC.

| All (n=100)       | Tumor, n |      |                             | Stroma, n |         |                             |
|-------------------|----------|------|-----------------------------|-----------|---------|-----------------------------|
|                   | DCB      | NDCB | <i>P</i> value <sup>#</sup> | DCB       | Non-DCB | <i>P</i> value <sup>#</sup> |
| <b>T cell</b>     |          |      |                             |           |         |                             |
| < median          | 8        | 47   |                             | 11        | 39      |                             |
| ≥ median          | 22       | 23   | 0.0002,**                   | 19        | 31      | 0.0809                      |
| <b>Treg</b>       |          |      |                             |           |         |                             |
| < median          | 14       | 36   |                             | 11        | 28      |                             |
| ≥ median          | 16       | 34   | 0.6625                      | 19        | 42      | 0.7541                      |
| <b>B cell</b>     |          |      |                             |           |         |                             |
| < median          | 7        | 41   |                             | 10        | 35      |                             |
| ≥ median          | 23       | 29   | 0.0012,**                   | 20        | 35      | 0.1247                      |
| <b>Macrophage</b> |          |      |                             |           |         |                             |
| < median          | 6        | 20   |                             | 16        | 30      |                             |
| ≥ median          | 24       | 50   | 0.3705                      | 14        | 40      | 0.3354                      |

DCB, durable clinical benefit; NDCB, non-durable clinical benefit; #, Chi-square test

**Supplementary Table 3.** Association between immune cell proportion in tumor and clinicopathological features

| Variables | Status           | No | CD8 <sup>+</sup> T cell (%) |      | CD4 <sup>+</sup> T cell (%) |      | Treg (%)   |      | B cell (%) |      | Macrophage (%) |      |
|-----------|------------------|----|-----------------------------|------|-----------------------------|------|------------|------|------------|------|----------------|------|
|           |                  |    | Mean± SE                    | P    | Mean± SE                    | P    | Mean± SE   | P    | Mean± SE   | P    | Mean± SE       | P    |
| Age       | < 61             | 48 | 0.44 ± 0.1                  |      | 1.18 ± 0.3                  |      | 0.08 ± 0.0 |      | 0.24 ± 0.1 |      | 0.28 ± 0.1     |      |
|           | ≥ 61             | 52 | 0.92 ± 0.3                  | 0.09 | 1.57 ± 0.4                  | 0.39 | 0.12 ± 0.0 | 0.28 | 0.37 ± 0.2 | 0.54 | 0.46 ± 0.1     | 0.31 |
| Gender    | Male             | 73 | 0.84 ± 0.2                  |      | 1.60 ± 0.3                  |      | 0.12 ± 0.0 |      | 0.35 ± 0.1 |      | 0.46 ± 0.1     |      |
|           | Female           | 27 | 0.28 ± 0.1                  | 0.08 | 0.79 ± 0.2                  | 0.11 | 0.05 ± 0.0 | 0.08 | 0.19 ± 0.1 | 0.50 | 0.15 ± 0.0     | 0.10 |
| Histology | Non-SQ           | 74 | 0.72 ± 0.2                  |      | 1.52 ± 0.3                  |      | 0.09 ± 0.0 |      | 0.24 ± 0.1 |      | 0.41 ± 0.1     |      |
|           | SQ               | 26 | 0.60 ± 0.2                  | 0.69 | 0.98 ± 0.3                  | 0.29 | 0.12 ± 0.0 | 0.53 | 0.51 ± 0.4 | 0.28 | 0.26 ± 0.1     | 0.43 |
| Smoking   | Smoker           | 67 | 0.76 ± 0.2                  |      | 1.57 ± 0.3                  |      | 0.11 ± 0.0 |      | 0.38 ± 0.2 |      | 0.47 ± 0.1     |      |
|           | Never<br>-smoker | 33 | 0.54 ± 0.3                  | 0.46 | 0.99 ± 0.3                  | 0.22 | 0.07 ± 0.0 | 0.20 | 0.17 ± 0.1 | 0.36 | 0.17 ± 0.0     | 0.09 |

**Supplementary Table 4.** Association between PD-L1 and clinicopathological features (n = 91).

| Variables | Status       | No. | PD-L1 (%)      |                |
|-----------|--------------|-----|----------------|----------------|
|           |              |     | Mean $\pm$ SE  | <i>P</i> value |
| Age       | < 61         | 43  | 27.2 $\pm$ 5.4 | 0.5114         |
|           | $\geq$ 61    | 48  | 32.2 $\pm$ 5.2 |                |
| Gender    | Male         | 69  | 35.2 $\pm$ 4.5 | 0.0115, *      |
|           | Female       | 22  | 13.2 $\pm$ 5.4 |                |
| Histology | Non-SQ       | 66  | 29.9 $\pm$ 4.4 | 0.9992         |
|           | SQ           | 25  | 29.8 $\pm$ 7.3 |                |
| Smoking   | Smoker       | 63  | 34.2 $\pm$ 4.7 | 0.0811         |
|           | Never-smoker | 28  | 20.0 $\pm$ 5.7 |                |

SQ, squamous; DCB, durable clinical benefit; NDCB, non-durable clinical benefit
